# Supplementary material
Source: publisher figshare collection journal article supplement (https://acs.figshare.com/ndownloader/files/18727409)
Supplement: Supplementary file 1 [file 18727409]

## Electronic Supplementary Information (ESI)

### **An Asymmetric Supercapacitor Based on a Non-Calcined 3D Pillared Cobalt(II) Metal-Organic Framework with Long Cyclic Stability**

Soheila Sanati,<sup>†</sup> Reza Abazari,<sup>†</sup> Ali Morsali,<sup>†\*</sup> Alexander M. Kirillov,<sup>‡</sup> Peter C. Junk<sup>§</sup> and Jun  
Wang<sup>§</sup>

<sup>†</sup>Department of Chemistry, Faculty of Basic Sciences, Tarbiat Modares University, Tehran,  
14115–175, Iran

<sup>‡</sup>Centro de Química Estrutural, Instituto Superior Técnico, Universidade de Lisboa, Av. Rovisco  
Pais, 1049-001 Lisbon, Portugal; Peoples' Friendship University of Russia (RUDN University), 6  
Miklukho-Maklaya st., Moscow, 117198, Russia

<sup>§</sup>College of Science & Engineering, James Cook University, Townsville, Queensland 4811,  
Australia

\*E-mail: morsali\_a@modares.ac.ir

**Materials and physical techniques.** All starting materials for the synthesis were purchased from commercial providers and used without further purification. FT-IR spectra were recorded using a Nicolet Fourier Transform IR 100 spectrometer in the 400-4000  $\text{cm}^{-1}$  range using the KBr disk technique. The thermal behavior of the samples was analyzed by a PL-STA 1500 apparatus working under a nitrogen atmosphere and at the heating rate of 10  $^{\circ}\text{C min}^{-1}$ . Powder X-ray diffraction (PXRD) measurements were performed using a Bruker AXS model D8 advanced with monochromated Cu-K $\alpha$  ( $\lambda=1.54056$  Å) radiation. The  $\text{N}_2$  adsorption/desorption isotherms were measured at 77 K using a Micromeritics ASAP 2020 analyzer. The specific surface area was calculated by the Brunauer-Emmett-Teller (BET) method. The inductively coupled plasma (ICP) analysis was performed on a Varian ICP-OES VISTA-PRO CCD instrument. A CHNS Thermo Scientific Flash 2000 elemental analyzer was used to analyze elemental contributions to the samples. Finally, melting points were measured on an Electrothermal 9100 apparatus.

**X-ray diffraction structure determinations:** Single crystals coated with viscous hydrocarbon oil were mounted on loops. Data of Co(II)-TMU-63 were obtained at  $-173$   $^{\circ}\text{C}$  (100 K) on the MX1 beamline at the Australian Synchrotron operating at 17.4 keV ( $\lambda = 0.7109$  Å) with data collection conducted using Blu-Ice control software.<sup>S1</sup> The diffraction data were processed, reduced and corrected with the XDS software suite.<sup>S2</sup> The structures were solved by conventional methods and refined by full-matrix least-squares on all  $F^2$  data using SHELX2014,<sup>S3</sup> in conjunction with the X-Seed<sup>S4</sup> or Olex2<sup>S5</sup> graphical user interface. All hydrogen atoms were placed in calculated positions using the riding model. Crystal data and refinement details are given in Table S1. CCDC-1944674 contains the supplementary crystallographic data for this

paper. These data can be obtained free of charge from The Cambridge Crystallographic Data Centre via [www.ccdc.cam.ac.uk/data\\_request/cif](http://www.ccdc.cam.ac.uk/data_request/cif).

**MOF activation method.** Under vacuum, each sample of Co(II)-TMU-63 was heated at 140 °C in an oven for 48 h. When all DMF moieties are removed, the structure experiences no damage or impairment.

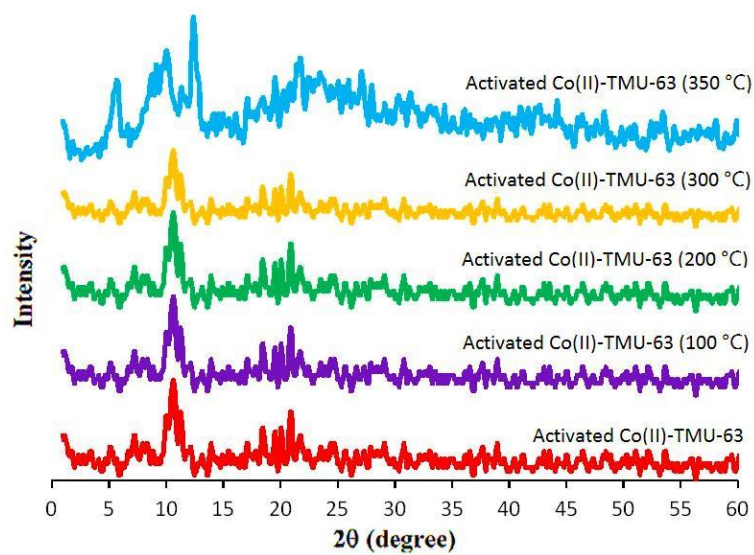

**Figure S1.** PXRD patterns of Co(II)-TMU-63 at different temperatures.

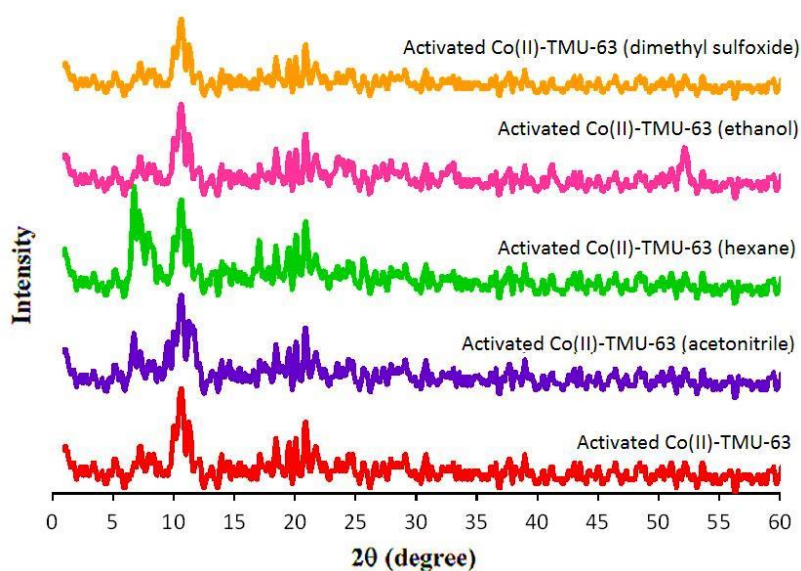

**Figure S2.** PXRD patterns of Co(II)-TMU-63 after refluxing for 24 h in different solvents.

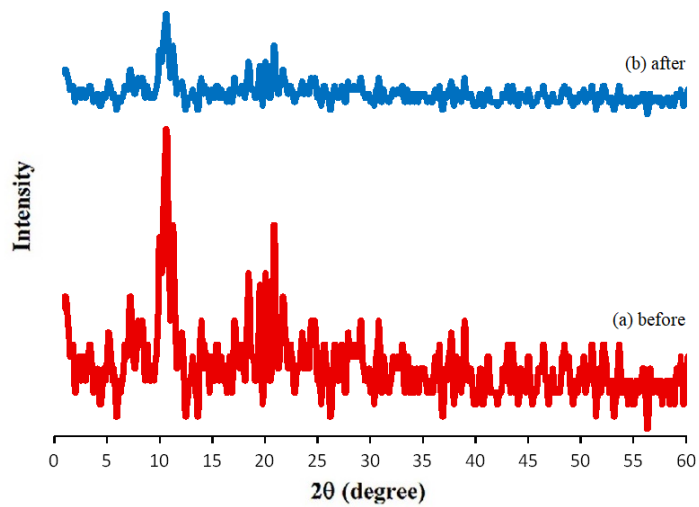

**Figure S3.** PXRD patterns of Co(II)-TMU-63 before and after cyclic stability test.

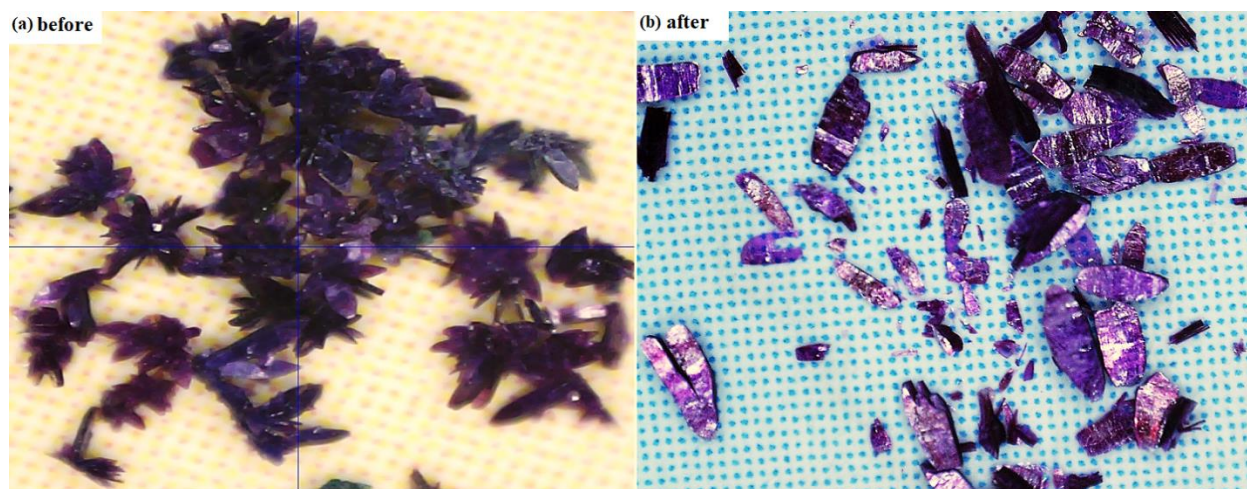

**Figure S4.** Light microscope image of solvated bulk sample of the Co(II)-TMU-63 crystals (a) before and (b) after cyclic stability test.

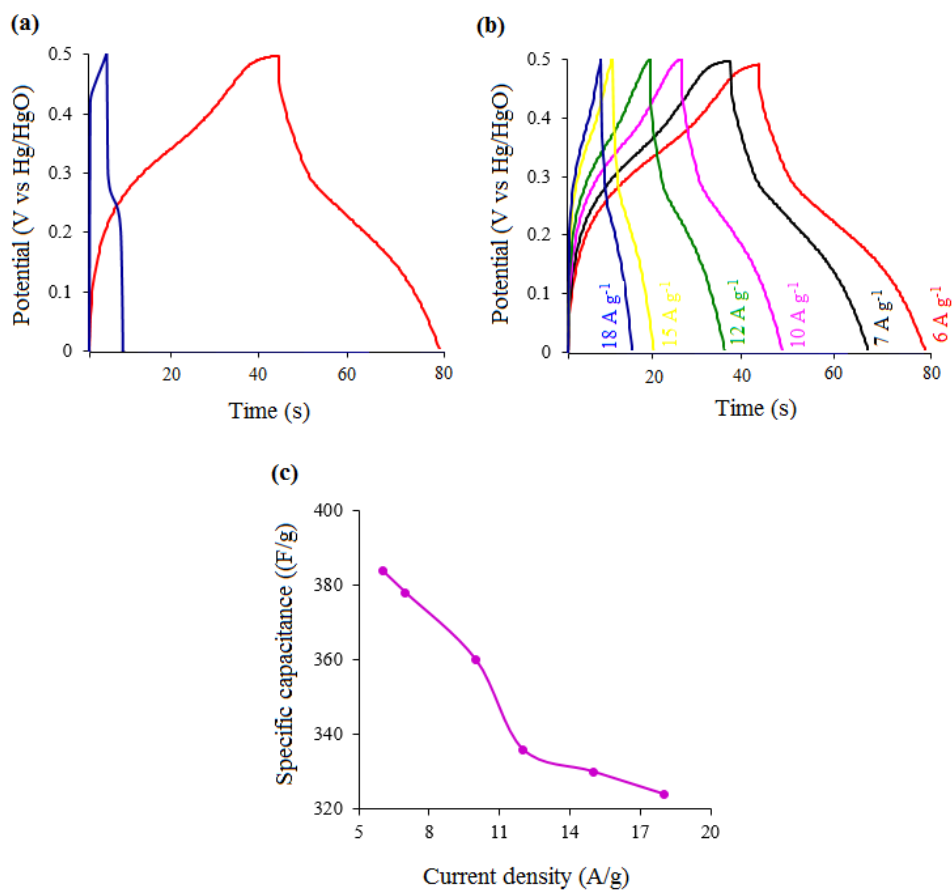

**Figure S5.** Charge-discharge curves of the Co(II)-TMU-63 electrode material: (a) at  $6 \text{ A g}^{-1}$  current density and (b) at various current densities from  $6$  to  $18 \text{ A g}^{-1}$ . (c) Relationship of the specific capacitance and current densities from  $6$  to  $18 \text{ A g}^{-1}$ .

**Table S1.** Crystal data and structure refinement for Co(II)-TMU-63.

|                                             |                                                                                  |
|---------------------------------------------|----------------------------------------------------------------------------------|
| Identification code                         | Co(II)-TMU-63                                                                    |
| Empirical formula                           | C <sub>20</sub> H <sub>21</sub> Co <sub>1.50</sub> N <sub>4</sub> O <sub>8</sub> |
| Formula weight                              | 533.80                                                                           |
| Temperature/K                               | 173(2)                                                                           |
| Crystal system                              | monoclinic                                                                       |
| Space group                                 | C 2/c                                                                            |
| a/Å                                         | 31.351(6)                                                                        |
| b/Å                                         | 9.5960(19)                                                                       |
| c/Å                                         | 18.028(4)                                                                        |
| α/°                                         | 90                                                                               |
| β/°                                         | 118.68(3)                                                                        |
| γ/°                                         | 90                                                                               |
| Volume/Å <sup>3</sup>                       | 4758(2)                                                                          |
| Z                                           | 8                                                                                |
| ρ <sub>calc</sub> /g/cm <sup>3</sup>        | 1.490                                                                            |
| F(000)                                      | 2188                                                                             |
| Crystal size/mm <sup>3</sup>                | 0.240                                                                            |
| Radiation                                   | Mo Kα (λ = 0.71073)                                                              |
| 2θ range for data collection/°              | 1.481 to 24.99                                                                   |
| Index ranges                                | -37 ≤ h ≤ 37, -11 ≤ k ≤ 11, -21 ≤ l ≤ 21                                         |
| Reflections collected                       | 27245                                                                            |
| Independent reflections                     | 11818 [R <sub>int</sub> = 0.0722, R <sub>sigma</sub> = 0.1427]                   |
| Data/restraints/parameters                  | 4186/9/283                                                                       |
| Goodness-of-fit on F <sup>2</sup>           | 1.062                                                                            |
| Final R indexes [I > 2σ (I)]                | R <sub>1</sub> = 0.0773, wR <sub>2</sub> = 0.1978                                |
| Final R indexes [all data]                  | R <sub>1</sub> = 0.0707, wR <sub>2</sub> = 0.2048                                |
| Largest diff. peak/hole / e Å <sup>-3</sup> | 1.923/-1.461                                                                     |

## Reference

- S1 Cowieson, N. P.; Aragao, D.; Clift, M.; Ericsson, D. J.; Gee, C.; Harrop, S. J.; Mudie, N.; Panjikar, S.; Price, J. R.; Riboldi-Tunnicliffe, A.; Williamson, R.; Caradoc-Davies, T. *J. Synchrotron Rad.* **2015**, *22*, 187–190.
- S2 Kabsch, W. *J. Appl. Cryst.* **1993**, *26*, 795-800.
- S3 Sheldrick, G. M. *Acta Cryst.* **2015**, *C71*, 3-8.
- S4 Barbour, L. J. *J. Supramol. Chem.* **2001**, *1*, 189-191.
- S5 Dolomanov, O. V.; Bourhis, L. J.; Gildea, R. J.; J. Howard, A. K.; Puschmann, H. *J. Appl. Cryst.* **2009**, *42*, 339-341.
